# Supplementary material
Source: publisher figshare collection journal article supplement (https://scielo.figshare.com/articles/dataset/_/6235502)
Supplement: Supplementary file 1 [file Table_1.xls]

## Sheet: Table_1
<b><strong>Noise Factor</strong></b>	<b><strong>Acceptable condition</strong></b>	<b><strong>No Acceptable condition</strong></b>
<strong>Short Wave (SW)</strong>	0 ≤ SW ≤ 25	SW > 25
<strong>Long Wave (LW)</strong>	0 ≤ LW ≤ 8	LW > 8
