# Supplementary material
Source: publisher figshare collection journal article supplement (https://scielo.figshare.com/articles/dataset/_/6235502)
Supplement: Supplementary file 2 [file Table_2.xls]

## Sheet: Table_2
<b><strong>Control Factors</strong></b>	<b><strong>Simbol</strong></b>	<b><strong>Unit</strong></b>	<b><strong>Level 1</strong></b>	<b><strong>Level 2</strong></b>	<b><strong>Level 3</strong></b>
<strong>Speed</strong>	A	m/s	680	800	920
<strong>Paint Fluid Pressure</strong>	B	psi (kPa)	160	190	220
<strong>Atomizing air pressure</strong>	C	psi (kPa)	180	210	240
<strong>Rotating atomizer head speed</strong>	D	Rotação / min	90	110	130
<strong>Operating voltage</strong>	E	kilovolts	150	180	210
