# Supplementary material
Source: publisher figshare collection journal article supplement (https://scielo.figshare.com/articles/dataset/_/6235502)
Supplement: Supplementary file 3 [file Table_3.xls]

## Sheet: Table_3
<b><strong>Test Number</strong></b>	<b><strong>Level of Factors</strong></b>
	<strong>A</strong>	<strong>B</strong>	<strong>C</strong>	<strong>D</strong>	<strong>E</strong>
<strong>1</strong>	680	160	180	90	150
<strong>2</strong>	680	160	180	90	180
<strong>3</strong>	680	160	180	90	210
<strong>4</strong>	680	190	210	110	150
<strong>5</strong>	680	190	210	110	180
<strong>6</strong>	680	190	210	110	210
<strong>7</strong>	680	220	240	130	150
<strong>8</strong>	680	220	240	130	180
<strong>9</strong>	680	220	240	130	210
<strong>10</strong>	800	160	210	130	150
<strong>11</strong>	800	160	210	130	180
<strong>12</strong>	800	160	210	130	210
<strong>13</strong>	800	190	240	90	150
<strong>14</strong>	800	190	240	90	180
<strong>15</strong>	800	190	240	90	210
<strong>16</strong>	800	220	180	110	150
<strong>17</strong>	800	220	180	110	180
<strong>18</strong>	800	220	180	110	210
<strong>19</strong>	920	160	240	110	150
<strong>20</strong>	920	160	240	110	180
<strong>21</strong>	920	160	240	110	210
<strong>22</strong>	920	190	180	130	150
<strong>23</strong>	920	190	180	130	180
<strong>24</strong>	920	190	180	130	210
<strong>25</strong>	920	220	210	90	150
<strong>26</strong>	920	220	210	90	180
<strong>27</strong>	920	220	210	90	210
