# Supplementary material
Source: publisher figshare collection journal article supplement (https://scielo.figshare.com/articles/dataset/_/6235502)
Supplement: Supplementary file 4 [file Table_4.xls]

## Sheet: Table_4
<b><strong>Test Number</strong></b>	<b><strong>Level of Factors</strong></b>					<b><strong>Noise Factor</strong></b>				<b><strong>S/R (dB)</strong><br><strong>SW</strong></b>	<b><strong>S/R (dB) LW</strong></b>
	<strong>A</strong>	<strong>B</strong>	<strong>C</strong>	<strong>D</strong>	<strong>E</strong>	<strong>SW<sub>1</sub></strong>	<strong>LW<sub>1</sub></strong>	<strong>SW<sub>2</sub></strong>	<strong>LW<sub>2</sub></strong>
<strong>1</strong>	680	160	180	90	150	<strong>23.7</strong>	<strong>5.9</strong>	<strong>23.6</strong>	<strong>5.1</strong>	-27.48	-14.83
<strong>2</strong>	680	160	180	90	180	25.6	<strong>5.9</strong>	<strong>24.9</strong>	<strong>4.8</strong>	-28.05	-14.61
<strong>3</strong>	680	160	180	90	210	30.8	<strong>6.0</strong>	25.7	<strong>6.9</strong>	-29.06	-16.21
<strong>4</strong>	680	190	210	110	150	29.6	8.2	32.5	9.5	-29.85	-18.96
<strong>5</strong>	680	190	210	110	180	39.2	11.4	40.5	<strong>7.7</strong>	-32.01	-19.76
<strong>6</strong>	680	190	210	110	210	29.3	<strong>5.6</strong>	31.0	8.1	-29.59	-16.86
<strong>7</strong>	680	220	240	130	150	33.8	10.2	38.3	12.9	-31.15	-21.31
<strong>8</strong>	680	220	240	130	180	36.0	10.1	44.9	18.1	-32.19	-23.32
<strong>9</strong>	680	220	240	130	210	32.8	8.5	40.4	16.7	-31.32	-22.44
<strong>10</strong>	800	160	210	130	150	29.3	<strong>5.4</strong>	35.7	<strong>6.3</strong>	-30.28	-15.37
<strong>11</strong>	800	160	210	130	180	27.6	<strong>6.9</strong>	33.0	9.1	-29.66	-18.14
<strong>12</strong>	800	160	210	130	210	37.3	<strong>6.9</strong>	39.3	14.5	-31.67	-21.10
<strong>13</strong>	800	190	240	90	150	32.9	10.0	35.9	9.4	-30.74	-19.74
<strong>14</strong>	800	190	240	90	180	36.1	8.4	28.3	<strong>6.8</strong>	-30.22	-17.66
<strong>15</strong>	800	190	240	90	210	29.6	<strong>7.9</strong>	31.0	<strong>6.9</strong>	-29.63	-17.40
<strong>16</strong>	800	220	180	110	150	29.2	<strong>7.0</strong>	32.5	8.4	-29.80	-17.77
<strong>17</strong>	800	220	180	110	180	<strong>24.6</strong>	<strong>5.3</strong>	<strong>23.1</strong>	<strong>7.4</strong>	-27.55	-16.17
<strong>18</strong>	800	220	180	110	210	30.5	<strong>7.5</strong>	35.5	11.0	-30.40	-19.48
<strong>19</strong>	920	160	240	110	150	28.5	10.0	32.1	10.1	-29.64	-20.04
<strong>20</strong>	920	160	240	110	180	<strong>15.0</strong>	<strong>4.7</strong>	<strong>24.2</strong>	<strong>4.9</strong>	-26.08	-13.63
<strong>21</strong>	920	160	240	110	210	38.9	15.3	25.1	<strong>5.9</strong>	-30.30	-21.29
<strong>22</strong>	920	190	180	130	150	28.3	<strong>6.3</strong>	27.0	<strong>5.8</strong>	-28.84	-15.64
<strong>23</strong>	920	190	180	130	180	30.7	<strong>6.3</strong>	38.1	<strong>7.2</strong>	-30.78	-16.61
<strong>24</strong>	920	190	180	130	210	38.5	10.0	25.5	<strong>6.4</strong>	-30.28	-18.48
<strong>25</strong>	920	220	210	90	150	36.3	<strong>7.7</strong>	35.2	10.2	-31.07	-19.12
<strong>26</strong>	920	220	210	90	180	<strong>21.3</strong>	<strong>4.2</strong>	<strong>18.2</strong>	<strong>5.5</strong>	-25.94	-13.79
<strong>27</strong>	920	220	210	90	210	38.2	9.0	44.1	8.8	-32.31	-18.99
