# Supplementary material
Source: publisher figshare collection journal article supplement (https://scielo.figshare.com/articles/dataset/_/6235502)
Supplement: Supplementary file 5 [file Table_5.xls]

## Sheet: Table_5
<b><strong>Level</strong></b>	<b><strong>Speed</strong></b>	<b><strong>Outflow</strong></b>	<b><strong>Air</strong></b>	<b><strong>rpm</strong></b>	<b><strong>Tension</strong></b>
<strong>1</strong>	-30.08	-29.13	-29.14	-29.39	-29.87
<strong>2</strong>	-29.99	-30.22	-30.26	-29.47	-29.16
<strong>3</strong>	-29.47	-30.19	-30.14	-30.69	-30.50
<strong>Variation</strong>	0.61	1.08	1.13	1.30	1.34
<strong>Performance</strong>	5	4	3	2	1
