# Supplementary material
Source: publisher figshare collection journal article supplement (https://scielo.figshare.com/articles/dataset/_/6235502)
Supplement: Supplementary file 6 [file Table_6.xls]

## Sheet: Table_6
<b><strong>Test number</strong></b>	<b><strong>Level of Factors</strong></b>					<b><strong>Noise Factor</strong></b>
	<strong>A</strong>	<strong>B</strong>	<strong>C</strong>	<strong>D</strong>	<strong>E</strong>	<strong>SW<sub>1</sub></strong>	<strong>LW<sub>1</sub></strong>	<strong>SW<sub>2</sub></strong>	<strong>LW<sub>2</sub></strong>
<strong>Optimum Combination</strong>	920	160	180	90	180	15.2	4.1	14.8	4.1
